# Supplementary material for: Glutamate dependent NMDA receptor 2D is a novel angiogenic tumour endothelial marker in colorectal cancer
Source: PubMed Central journal article supplement (PMC4991466; doi:10.18632/oncotarget.7812), 2016-03-01
Supplement: oncotarget-07-20440-s001.pdf [file oncotarget-07-20440-s001.pdf]

## SUPPLEMENTARY FIGURES AND TABLES

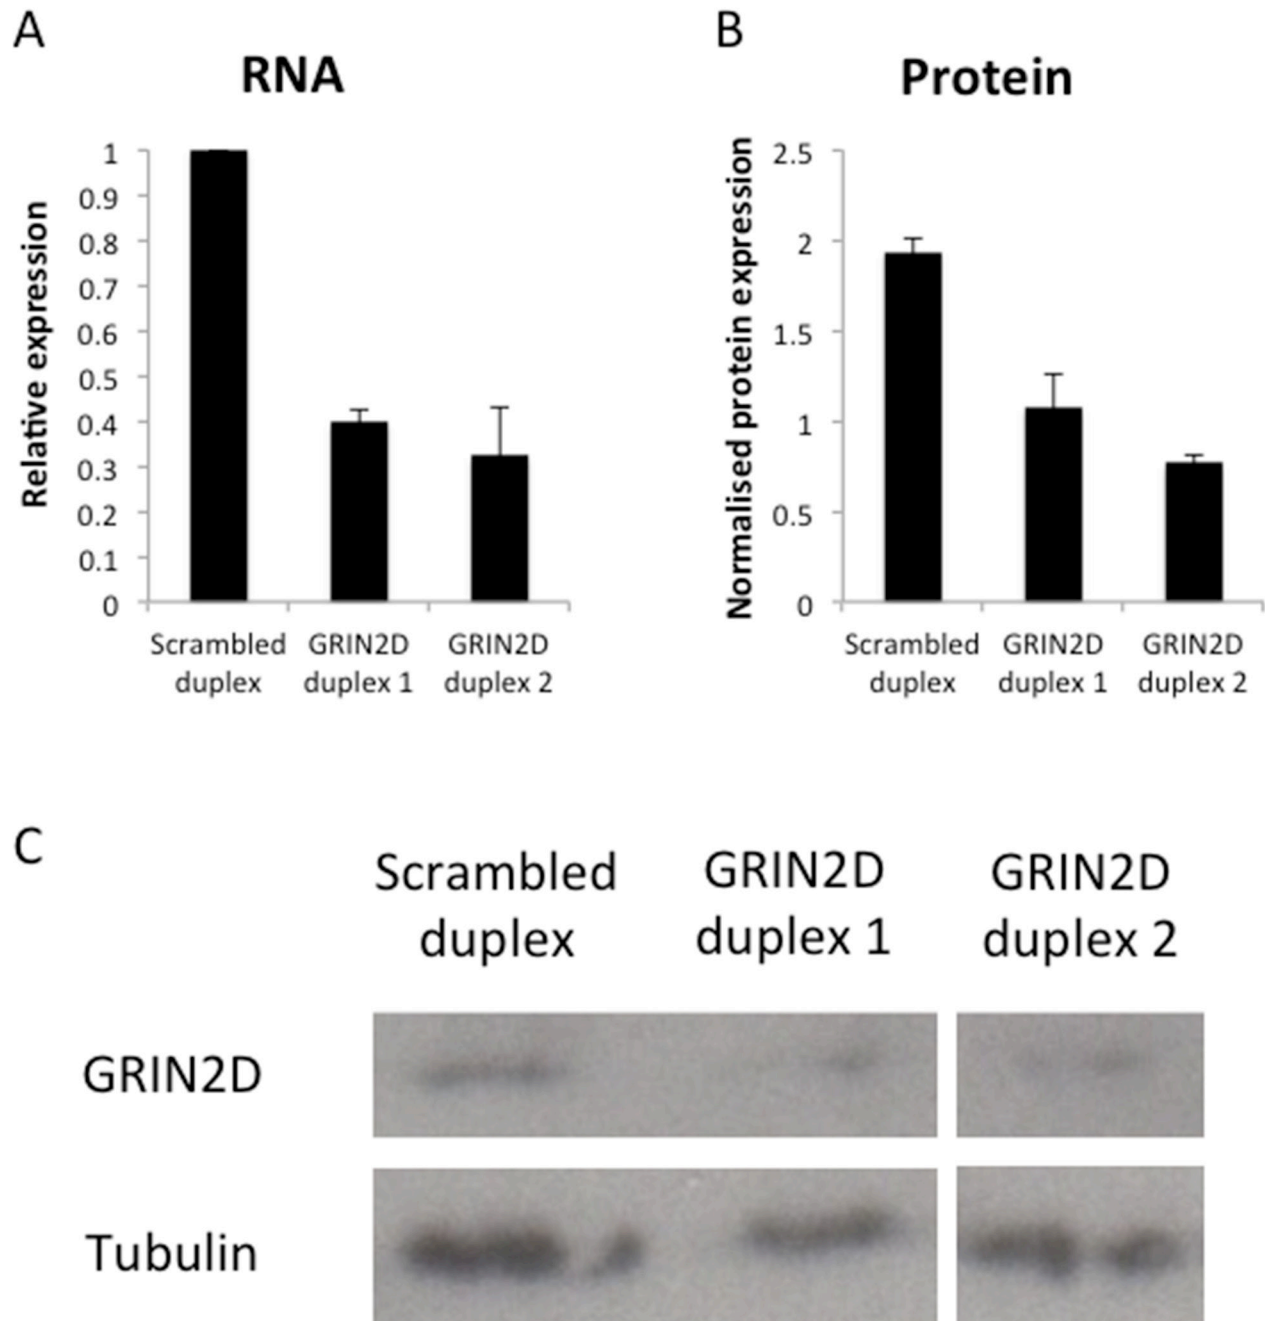

**Supplementary Figure S1: siRNA duplexes successfully knockdown GRIN2D expression on the RNA and protein level.** Analysis of GRIN2D expression in three cords of HUVEC treated with a scrambled duplex or two GRIN2D targeting duplexes, by **A.** RTqPCR (normalised to flotillin-2) or **B.** western blot (normalised to Tubulin) (n=3, average expression  $\pm$  SEM). **C.** representative western blot images (GRIN2D band - 70 kDa, Tubulin band - 55 kDa).

**A**

|        |                                                              |    |
|--------|--------------------------------------------------------------|----|
|        | 1                                                            | 60 |
| GRIN2D | MRGAGGPRGPRGPAKMLLLLALACASPFPEEVPGPGAAGGGTGGARPLNVALVFS--GPA |    |
| GRIN2A | -----MGR LGYWTLLVLPALL-----VWHGPAQNAAAEKGTPALNI AVLLG-HSHD   |    |
| GRIN2B | ----MKPSAECCSPKFWLVLAVLAV-----SGSKARSQKSAPSIGI AVILVGTSD E   |    |
| GRIN2C | ---MGGA---LGPALLTSL-----LGAWAGLGAGQGEQAVTVAVVFGSSGPL         |    |
|        | 78                                                           |    |
| GRIN2D | YAAEAARLGPVAAA VRSPG                                         |    |
| GRIN2A | VTERE-LRNLWGPEQATGLP                                         |    |
| GRIN2B | VAI----KDAHEKDDFH HLS                                        |    |
| GRIN2C | QAQARTRLTPQ---NFLDLP                                         |    |

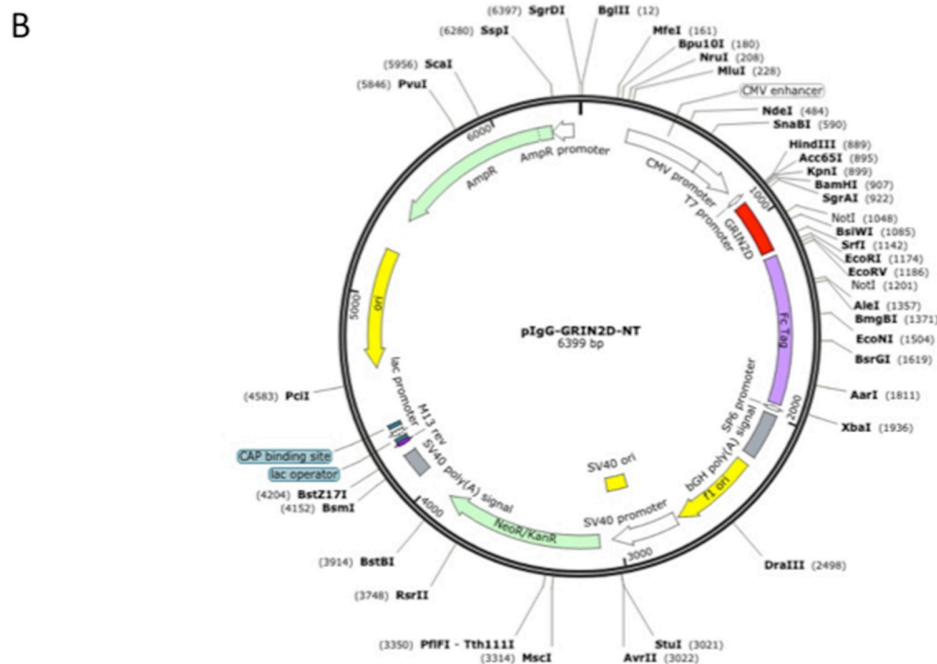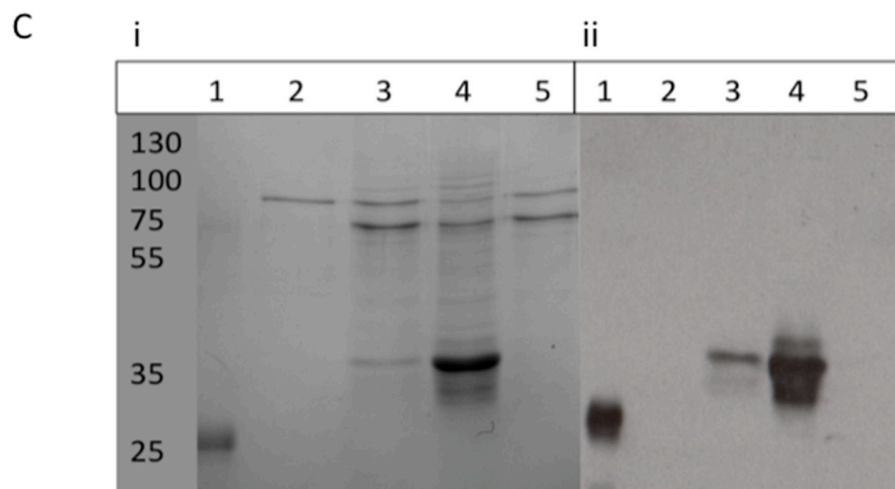

**Supplemental Figure S2: Construction and production of GRIN2D-Fc fusion protein.** A. The N-terminal sequence (bp 1-78) was identified as unique and specific to GRIN2D. B. This peptide was ligated into the pIgG (pcDNA3.1) vector for onward production in HEK-293T cells. Secreted media was collected and affinity purified using a protein A column. C. Corresponding Coomassie Stain (i) and anti-Fc Western Blot (ii) of 12% SDS-PAGE Gel. Lane 1 – Purified Human Fc. Lane 2 – Optimem. Lane 3 – Secreted Media. Lane 4 – Purified GRIN2D-Fc. Lane 5 – Depleted Media. Predicted size of hGRINDFc = 34 kDa; Fc = 26 kDa.

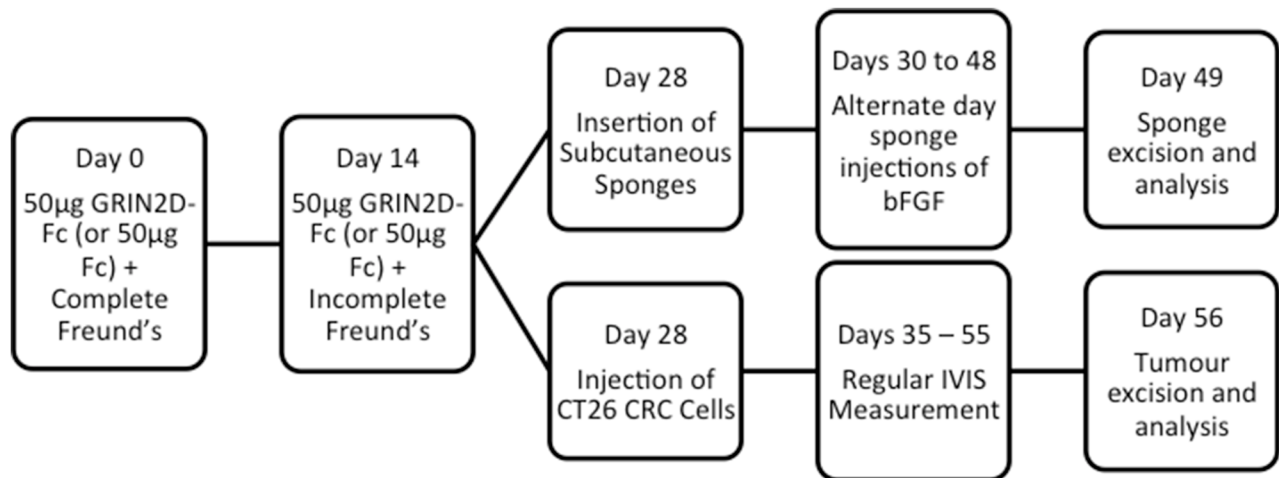

**Supplementary Figure S3: Protocols for murine vaccination model followed by either subcutaneous sponge or subcutaneous CT26-luc tumour implantation.**

**Supplementary Table S1: Matrix metalloproteinases enriched in colorectal cancer vessels**

| Gene ID                                                   | Gene Symbol | GeneBank accession no. | LogFC | P-value |
|-----------------------------------------------------------|-------------|------------------------|-------|---------|
| matrix metalloproteinase 3 (stromelysin 1, progelatinase) | MMP3        | NM_002422              | 5.72  | 0.01    |
| matrix metalloproteinase 7 (matrilysin, uterine)          | MMP7        | NM_002423              | 5.54  | 0.00    |
| matrix metalloproteinase 12 (macrophage elastase)         | MMP12       | NM_002426              | 4.86  | 0.00    |
| matrix metalloproteinase 1 (interstitial collagenase)     | MMP1        | NM_002421              | 4.49  | 0.04    |
| matrix metalloproteinase 9 (gelatinase B)                 | MMP9        | NM_004994              | 4.10  | 0.00    |
| matrix metalloproteinase 11 (stromelysin 3)               | MMP11       | NM_005940              | 3.25  | 0.01    |
| matrix metalloproteinase 10 (stromelysin 2)               | MMP10       | NM_002425              | 2.54  | 0.10    |
| matrix metalloproteinase 14 (membrane-inserted)           | MMP14       | NM_004995              | 1.94  | 0.04    |
| matrix metalloproteinase 2 (gelatinase A)                 | MMP2        | NM_004530              | 1.51  | 0.16    |
| matrix metalloproteinase 13 (collagenase 3)               | MMP13       | NM_002427              | 1.18  | 0.11    |

Supplementary Table S2: Collagens enriched in colorectal cancer vessels

| Gene ID                       | Gene Symbol | GeneBank accession no. | LogFC | P-value |
|-------------------------------|-------------|------------------------|-------|---------|
| collagen, type I, alpha 1     | COL1A1      | NM_000088              | 4.18  | 0.00    |
| collagen, type XII, alpha 1   | COL12A1     | NM_004370              | 3.13  | 0.00    |
| collagen, type IV, alpha 1    | COL4A1      | NM_001845              | 2.86  | 0.00    |
| collagen, type I, alpha 2     | COL1A2      | NM_000089              | 2.79  | 0.01    |
| collagen, type XV, alpha 1    | COL15A1     | NM_001855              | 2.56  | 0.01    |
| collagen, type XVIII, alpha 1 | COL18A1     | NM_030582              | 2.42  | 0.00    |
| collagen, type IV, alpha 2    | COL4A2      | NM_001846              | 2.36  | 0.00    |
| collagen, type V, alpha 1     | COL5A1      | NM_000093              | 2.30  | 0.04    |
| collagen, type VIII, alpha 1  | COL8A1      | NM_001850              | 2.28  | 0.02    |
| collagen, type V, alpha 2     | COL5A2      | NM_000393              | 2.10  | 0.03    |
| collagen, type VII, alpha 1   | COL7A1      | NM_000094              | 2.00  | 0.17    |
| collagen, type V, alpha 3     | COL5A3      | NM_015719              | 1.79  | 0.01    |
| collagen, type X, alpha 1     | COL10A1     | NM_000493              | 1.69  | 0.06    |
| collagen, type III, alpha 1   | COL3A1      | NM_000090              | 1.66  | 0.10    |
| collagen, type XIV, alpha 1   | COL14A1     | NM_021110              | 1.54  | 0.08    |
| collagen, type VI, alpha 1    | COL6A1      | NM_001848              | 1.45  | 0.14    |
| collagen, type VI, alpha 3    | COL6A3      | NM_004369              | 1.44  | 0.08    |
| collagen, type IX, alpha 1    | COL9A1      | NM_001851              | 1.08  | 0.11    |

Supplementary Table S3: Key clinical data for CRC cohort showing overall survival (OS)

| Characteristics        | N of patients | Median OS | Mean OS |
|------------------------|---------------|-----------|---------|
| All                    | 90            | 87.5      | 112.8   |
| <b>Gender</b>          |               |           |         |
| Male                   | 65            | 86        | 107.2   |
| Female                 | 25            | 122       | 127.3   |
| <b>Age</b>             |               |           |         |
| above 58               | 47            | 122       | 130.2   |
| below or equal to 58   | 43            | 67        | 93.8    |
| <b>Stage</b>           |               |           |         |
| I/II                   | 44            | 157.5     | 148.5   |
| III/IV                 | 46            | 38        | 78.6    |
| <b>Tumour location</b> |               |           |         |
| Ascending colon        | 21            | 27        | 63.5    |
| Descending colon       | 6             | 194       | 183     |
| Sigmoid colon          | 31            | 84        | 96.6    |
| Transverse colon       | 9             | 186       | 127.1   |
| Cecum                  | 4             | 102.5     | 109     |
| Rectum                 | 19            | 186       | 165.6   |
| <b>T-stage</b>         |               |           |         |
| T2                     | 8             | 187.5     | 160.5   |
| T3                     | 75            | 86        | 105.5   |
| T4                     | 7             | 122       | 136.3   |
| <b>N-stage</b>         |               |           |         |
| N0                     | 50            | 129.5     | 138.3   |
| N1+                    | 40            | 33        | 80.1    |
| <b>M-stage</b>         |               |           |         |
| M0                     | 75            | 116       | 126.3   |
| M1                     | 15            | 42        | 45.3    |
| <b>GRIN2D staining</b> |               |           |         |
| Positive               | 21            | 154       | 137.6   |
| Negative               | 69            | 86        | 109.8   |
